# Supplementary material for: A Suppressor/Enhancer Screen in Drosophila Reveals a Role for Wnt-Mediated Lipid Metabolism in Primordial Germ Cell Migration
Source: PLOS journal article supplement (doi:10.1371/journal.pone.0026993), 2011-11-01

Figure S1

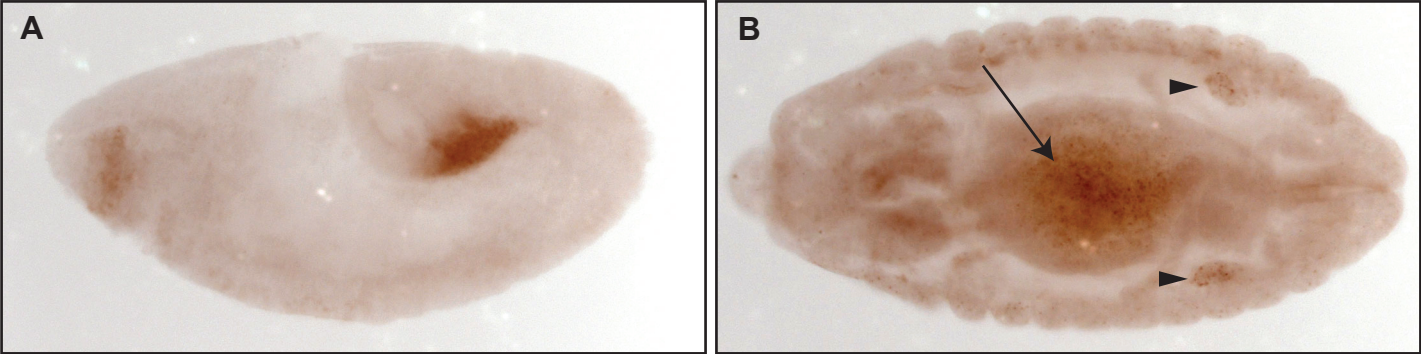

Supplement: S1 (10.1371/journal.pone.0026993.s001) [file journal.pone.0026993.s001]
